# Supplementary material for: High Concordance Between GPT-4o and Multidisciplinary Tumor Board Decisions in Breast Cancer: A Retrospective Decision Support Analysis
Source: Research Square preprint supplement (doi:10.21203/rs.3.rs-6812005/v1), 2025-06-13
Supplement: Supplementary file 1 [file 82cb184346bd1b752356d293.docx]

**Comparison of Treatment Decisions: Tumor Board vs ChatGPT**

| **Patient No** | **Tumor Board Decision** | **ChatGPT Decision (First)** | **ChatGPT Decision (Second)** | **Reviewer 1 Score** | **Reviewer 2 Score** |
| --- | --- | --- | --- | --- | --- |
| 1 | Surgery, Radiotherapy, Hormonal therapy | Surgery, Radiotherapy, Hormonal therapy | Surgery, Radiotherapy, Hormonal therapy | 5 | 5 |
| 2 | Surgery, Radiotherapy, Hormonal therapy | Surgery, Radiotherapy, Hormonal therapy | Surgery, Radiotherapy, Hormonal therapy | 5 | 5 |
| 3 | Surgery, Radiotherapy, Hormonal therapy | Surgery, Radiotherapy, Hormonal therapy | Surgery, Radiotherapy, Hormonal therapy | 5 | 5 |
| 4 | Neoadjuvant therapy, Radiotherapy, Genetic counseling/testing, Hormonal therapy, Surgery | Neoadjuvant therapy, Radiotherapy, Genetic counseling/testing, Hormonal therapy, Surgery | Neoadjuvant therapy, Radiotherapy, Genetic counseling/testing, Hormonal therapy, Surgery | 5 | 5 |
| 5 | Surgery, Radiotherapy, Hormonal therapy | Surgery, Radiotherapy, Hormonal therapy | Surgery, Radiotherapy, Hormonal therapy | 5 | 5 |
| 6 | Surgery, Radiotherapy, Hormonal therapy, Adjuvant therapy | Surgery, Radiotherapy, Hormonal therapy, Adjuvant therapy | Surgery, Radiotherapy, Hormonal therapy, Adjuvant therapy | 5 | 5 |
| 7 | Neoadjuvant therapy, Radiotherapy, Genetic counseling/testing, Surgery | Neoadjuvant therapy, Radiotherapy, Genetic counseling/testing, Surgery | Neoadjuvant therapy, Radiotherapy, Genetic counseling/testing, Surgery | 5 | 5 |
| 8 | Neoadjuvant therapy, Radiotherapy, Dual anti-HER2 therapy, Surgery | Neoadjuvant therapy, Radiotherapy, Dual anti-HER2 therapy, Surgery | Neoadjuvant therapy, Radiotherapy, Dual anti-HER2 therapy, Surgery | 5 | 5 |
| 9 | Neoadjuvant therapy, Radiotherapy, Dual anti-HER2 therapy, Hormonal therapy, Surgery | Neoadjuvant therapy, Radiotherapy, Dual anti-HER2 therapy, Hormonal therapy, Surgery | Neoadjuvant therapy, Radiotherapy, Dual anti-HER2 therapy, Hormonal therapy, Surgery | 5 | 5 |
| 10 | Neoadjuvant therapy, Radiotherapy, Dual anti-HER2 therapy, Surgery | Neoadjuvant therapy, Radiotherapy, Dual anti-HER2 therapy, Surgery | Neoadjuvant therapy, Radiotherapy, Dual anti-HER2 therapy, Surgery | 5 | 5 |
| 11 | Surgery, Radiotherapy | Surgery, Radiotherapy | Surgery, Radiotherapy | 5 | 5 |
| 12 | Neoadjuvant therapy, Radiotherapy, Dual anti-HER2 therapy, Genetic counseling/testing, Hormonal therapy | Neoadjuvant therapy, Radiotherapy, Dual anti-HER2 therapy, Genetic counseling/testing, Hormonal therapy | Neoadjuvant therapy, Radiotherapy, Dual anti-HER2 therapy, Genetic counseling/testing, Hormonal therapy | 5 | 5 |
| 13 | Neoadjuvant therapy, Radiotherapy, Dual anti-HER2 therapy, Hormonal therapy | Neoadjuvant therapy, Radiotherapy, Dual anti-HER2 therapy, Genetic counseling/testing, Hormonal therapy | Neoadjuvant therapy, Radiotherapy, Dual anti-HER2 therapy, Genetic counseling/testing, Hormonal therapy | 4 | 4 |
| 14 | Surgery, Radiotherapy, Hormonal therapy, Adjuvant therapy | Surgery, Radiotherapy, Hormonal therapy, Adjuvant therapy | Surgery, Radiotherapy, Hormonal therapy, Adjuvant therapy | 5 | 5 |
| 15 | Surgery, Hormonal therapy | Surgery, Hormonal therapy | Surgery, Hormonal therapy | 5 | 5 |
| 16 | Neoadjuvant therapy, Radiotherapy, Hormonal therapy, Adjuvant therapy, Surgery | Neoadjuvant therapy, Radiotherapy, Hormonal therapy, Adjuvant therapy, Surgery | Neoadjuvant therapy, Radiotherapy, Hormonal therapy, Adjuvant therapy, Surgery | 5 | 5 |
| 17 | Neoadjuvant therapy, Radiotherapy, Dual anti-HER2 therapy, Hormonal therapy, Surgery | Neoadjuvant therapy, Radiotherapy, Dual anti-HER2 therapy, Hormonal therapy, Surgery | Neoadjuvant therapy, Radiotherapy, Dual anti-HER2 therapy, Hormonal therapy, Surgery | 5 | 5 |
| 18 | Surgery, Radiotherapy, Hormonal therapy,  Adjuvant therapy | Surgery, Radiotherapy, Hormonal therapy, Adjuvant therapy | Surgery, Radiotherapy, Hormonal therapy, Adjuvant therapy | 5 | 5 |
| 19* | Neoadjuvant therapy, Radiotherapy, Genetic counseling/testing, Surgery | Neoadjuvant therapy, Radiotherapy, Genetic counseling/testing, **Hormonal therapy, Adjuvant therapy,** Surgery | Neoadjuvant therapy, Radiotherapy, Genetic counseling/testing, **Hormonal therapy, Adjuvant therapy,** Surgery | 5** | 5** |
| 20 | Surgery, Radiotherapy | Surgery, Radiotherapy | Surgery, Radiotherapy | 5 | 5 |
| 21 | Neoadjuvant therapy, Radiotherapy, Hormonal therapy, Surgery | Neoadjuvant therapy, Radiotherapy, Hormonal therapy, Surgery | Neoadjuvant therapy, Radiotherapy, Hormonal therapy, Surgery | 5 | 5 |
| 22 | Surgery, Radiotherapy, Genetic counseling/testing, Hormonal therapy, Adjuvant therapy | Surgery, Radiotherapy, Genetic counseling/testing, Hormonal therapy, Adjuvant therapy | Surgery, Radiotherapy, Genetic counseling/testing, Hormonal therapy, Adjuvant therapy | 5 | 5 |
| 23 | Neoadjuvant therapy, Dual anti-HER2 therapy | Neoadjuvant therapy, Dual anti-HER2 therapy | Neoadjuvant therapy, Dual anti-HER2 therapy | 5 | 5 |
| 24 | Surgery, Radiotherapy, Genetic counseling/testing, Hormonal therapy | Surgery, Radiotherapy, Genetic counseling/testing, Hormonal therapy | Surgery, Radiotherapy, Genetic counseling/testing, Hormonal therapy | 5 | 5 |
| 25 | Surgery, Radiotherapy, Hormonal therapy | Surgery, Radiotherapy, Hormonal therapy | Surgery, Radiotherapy, Hormonal therapy | 5 | 5 |
| 26 | Surgery, Radiotherapy, Hormonal therapy | Surgery, Radiotherapy, Hormonal therapy | Surgery, Radiotherapy, Hormonal therapy | 5 | 5 |
| 27 | Neoadjuvant therapy, Radiotherapy, Hormonal therapy, Surgery | Neoadjuvant therapy, Radiotherapy, Hormonal therapy, Surgery | Neoadjuvant therapy, Radiotherapy, Hormonal therapy, Surgery | 5 | 5 |
| 28 | Neoadjuvant therapy, Radiotherapy, Hormonal therapy, Surgery | Neoadjuvant therapy, Radiotherapy, Hormonal therapy, Surgery | Neoadjuvant therapy, Radiotherapy, Hormonal therapy, Surgery | 5 | 5 |
| 29 | Neoadjuvant therapy, Radiotherapy, Dual anti-HER2 therapy, Hormonal therapy, Surgery | Neoadjuvant therapy, Radiotherapy, Dual anti-HER2 therapy, Hormonal therapy, Surgery | Neoadjuvant therapy, Radiotherapy, Dual anti-HER2 therapy, Hormonal therapy, Surgery | 5 | 5 |
| 30 | Surgery, Radiotherapy, Hormonal therapy | Surgery, Radiotherapy, Hormonal therapy | Surgery, Radiotherapy, Hormonal therapy | 5 | 5 |
| 31 | Surgery, Hormonal therapy | Surgery, Hormonal therapy | Surgery, Hormonal therapy | 5 | 5 |
| 32 | Neoadjuvant therapy, Radiotherapy, Hormonal therapy, Surgery | Neoadjuvant therapy, Radiotherapy, Hormonal therapy, Surgery | Neoadjuvant therapy, Radiotherapy, Hormonal therapy, Surgery | 5 | 5 |
| 33 | Surgery, **Genetic counseling/testing**, Hormonal therapy | Surgery, Hormonal therapy | Surgery, Hormonal therapy | 4 | 4 |

Note:

* The patient has not yet undergone surgery and will be re-evaluated in the tumor board after the surgical procedure

** Given that the initial treatment approach was identical, both evaluators indicated that they assigned full scores accordingly
