# Supplementary material for: High Concordance Between GPT-4o and Multidisciplinary Tumor Board Decisions in Breast Cancer: A Retrospective Decision Support Analysis
Source: Research Square preprint supplement (doi:10.21203/rs.3.rs-6812005/v1), 2025-06-13
Supplement: Supplementary file 2 [file ee17151028ab1b0cbcedf2bc.docx]

# Table X. Comprehensive Clinicopathological and Biomarker Profiles of Patients with Breast Cancer

| **Patient ID** | **Age** | **First-Degree Family History of Breast Cancer ( n)** | **Pathogenic Germline Mutation Status** | **Personal History of Breast Cancer** | **Pathological Findings** | **Histological Grade** | **Estrogen Receptor (ER, %)** | **Progesterone Receptor (PR, %)** | **HER2 Status (IHC/FISH)** | **Ki-67 Proliferation Index (%)** | **T Stage** | **N Stage** | **M Stage** |
| --- | --- | --- | --- | --- | --- | --- | --- | --- | --- | --- | --- | --- | --- |
| 1 | 45 | 0 | Absent | Absent | Primary: Invasive ductal carcinoma | 2.0 | 75.0 | 75.0 | Negative | 13.0 | 1 | 0 | 0 |
| 2 | 55 | 0 | Absent | Absent | Primary: Invasive lobular carcinoma | 2.0 | 95.0 | 70.0 | Negative | 9.0 | 1 | 0 | 0 |
| 3 | 73 | 0 | Absent | Absent | Primary: Invasive ductal carcinoma | 2.0 | 90.0 | 0.0 | Negative | 14.0 | 1 | 0 | 0 |
| 4 | 38 | 0 | Absent | Absent | Primary: Invasive ductal carcinoma | 3.0 | 95.0 | 60.0 | Negative | 0.0 | 1 | 1 | 0 |
| 5 | 76 | 0 | Absent | Absent | Primary: Invasive lobular carcinoma; Additional: Lobular carcinoma in situ | 2.0,3.0 | 90.0 | 15.0 | Negative | 12.0 | 1 | 0 | 0 |
| 6 | 74 | 0 | Absent | Absent | Primary: Invasive ductal carcinoma; LVI: Positive | 2.0 | 95.0 | 3.0 | Negative | 14.0 | 1 | 1 | 0 |
| 7 | 44 | 0 | Absent | Absent | Primary: Invasive ductal carcinoma | 2.0 | 0.0 | 0.0 | Negative | 28.0 | 2 | 0 | 0 |
| 8 | 60 | 0 | Absent | Absent | Primary: Invasive ductal carcinoma; LVI: Positive | 3.0 | 0.0 | 0.0 | 3+ (IHC) | 32.0 | 1 | 1 | 0 |
| 9 | 52 | 0 | Absent | Absent | Primary: Invasive ductal carcinoma | 3.0 | 95.0 | 80.0 | 3+ (IHC) | 43.0 | 1 | 0 | 0 |
| 10 | 83 | 0 | Absent | Absent | Primary: Invasive lobular carcinoma | 3.0 | 0.0 | 50.0 | 2+ (FISH positive) | 3.0 | 1 | 2 | 0 |
| 11 | 68 | 0 | Absent | Absent | Primary: Ductal carcinoma in situ (DCIS) | 3.0 | 0.0 | 0.0 | Negative | 0.0 | 0 | 0 | 0 |
| 12 | 42 | 0 | Absent | Absent | Primary: Invasive ductal carcinoma | 3.0 | 80.0 | 90.0 | 3+ (IHC) | 65.0 | 2 | 1 | 1 |
| 13 | 45 | 0 | Absent | Absent | Primary: Invasive ductal carcinoma | 2.0 | 95.0 | 15.0 | 3+ (IHC) | 17.0 | 2 | 2 | 1 |
| 14 | 65 | **1** | Absent | Absent | Primary: Invasive ductal carcinoma | 2.0 | 40.0 | 40.0 | Negative | 33.0 | 2 | 0 | 0 |
| 15 | 84 | **1** | Absent | Absent | Primary: Invasive lobular carcinoma | 1.0 | 95.0 | 40.0 | Negative | 3.0 | 1 | 0 | 0 |
| 16 | 75 | 0 | Absent | Absent | Primary: Invasive ductal carcinoma | 3.0 | 99.0 | 90.0 | Negative | 28.0 | 2 | 2 | 0 |
| 17 | 60 | 0 | Absent | Absent | Primary: Invasive ductal carcinoma | 2.0 | 100.0 | 4.0 | 3+ (IHC) | 3.0 | 1 | 0 | 0 |
| 18 | 64 | 0 | Absent | Absent | Primary: Invasive ductal carcinoma | 3.0 | 100.0 | 0.0 | Negative | 25.0 | 1 | 0 | 0 |
| 19 | 39 | **1** | Absent | Absent | Primary: Invasive ductal carcinoma; Additional: Invasive lobular carcinoma | 2.0 | 30.0 | 5.0 | Negative | 11.0 | 3 | 1 | 0 |
| 20 | 91 | 0 | Absent | Absent | Primary: Malignant tumor with mesenchymal component | **Not Available** | 0 | 0 | Negative | 0 | 3 | 2 | 0 |
| 21 | 77 | 0 | Absent | Absent | Primary: Invasive ductal carcinoma | 3.0 | 80.0 | 0.0 | Negative | 34.0 | 2 | 1 | 0 |
| 22 | 42 | 0 | Absent | **Present** | Primary: Invasive ductal carcinoma | 2.0 | 90.0 | 90.0 | Negative | 25.0 | 2 | 1 | 0 |
| 23 | 69 | 0 | Absent | Absent | Primary: Invasive ductal carcinoma; Additional: Ductal carcinoma in situ (DCIS); LVI: Positive | 3.0 | 0.0 | 0.0 | 2+ (FISH positive) | 32.0 | 1 | 3 | 1 |
| 24 | 44 | 0 | Absent | Absent | Primary: Invasive lobular carcinoma | 2.0 | 45.0 | 30.0 | Negative | 5.0 | 1 | 1 | 0 |
| 25 | 43 | 0 | Absent | Absent | Primary: Invasive lobular carcinoma; LVI: Positive | 2.0 | 90.0 | 35.0 | Negative | 5.0 | 1 | 0 | 0 |
| 26 | 45 | 0 | Absent | Absent | Primary: Invasive ductal carcinoma | 2.0 | 75.0 | 75.0 | Negative | 13.0 | 1 | 0 | 0 |
| 27 | 47 | 0 | Absent | Absent | Primary: Invasive ductal carcinoma | 1.0 | 90.0 | 90.0 | Negative | 18.0 | 1 | 2 | 0 |
| 28 | 66 | 0 | Absent | Absent | Primary: Invasive ductal carcinoma | 2.0 | 95.0 | 30.0 | Negative | 24.0 | 3 | 1 | 0 |
| 29 | 52 | 0 | Absent | Absent | Primary: Invasive ductal carcinoma | 3.0 | 95.0 | 80.0 | 3+ (IHC) | 43.0 | 1 | 1 | 0 |
| 30 | 76 | 0 | Absent | Absent | Primary: Invasive ductal carcinoma; Additional: Ductal carcinoma in situ (DCIS) | 2.0 | 90.0 | 15.0 | Negative | 12.0 | 1 | 0 | 0 |
| 31 | 84 | **1** | Absent | Absent | Primary: Invasive lobular carcinoma | 1.0 | 60.0 | 5.0 | Negative | 2.0 | 1 | 0 | 0 |
| 32 | 73 | 0 | Absent | Absent | Primary: Invasive ductal carcinoma; Additional: Invasive micropapillary carcinoma; LVI: Positive | 2.0 | 95.0 | 55.0 | Negative | 14.0 | 3 | 2 | 0 |
| 33 | 56 | 0 | Absent | **Present** | Primary: Invasive ductal carcinoma | 2.0 | 95.0 | 5.0 | Negative | 14.0 | 1 | 0 | 0 |

Abbreviations: ER, estrogen receptor; PR, progesterone receptor; HER2, human epidermal growth factor receptor 2; IHC, immunohistochemistry; FISH, fluorescence in situ hybridization, LVI, lymphovascular invasion.
